# Supplementary material
Source: Springer Nature journal article supplement (https://www.springermedizin.de/resource/supplementary/12986_2011_319_MOESM2_ESM.pdf/25655822)

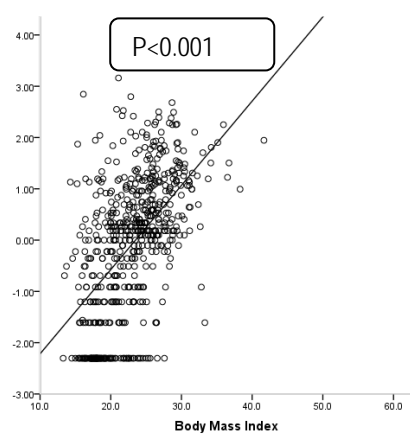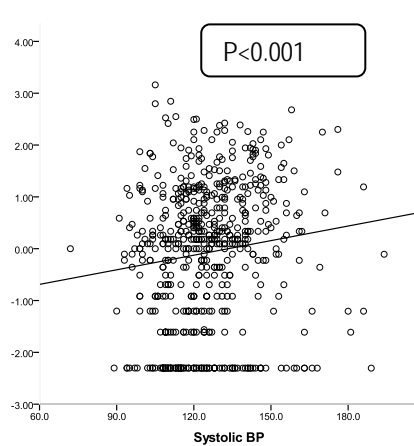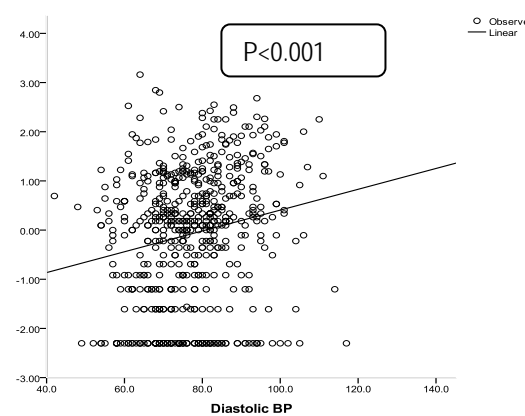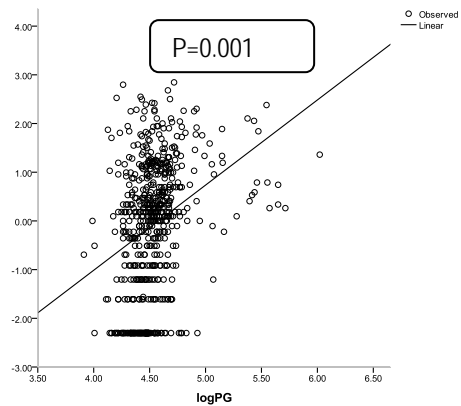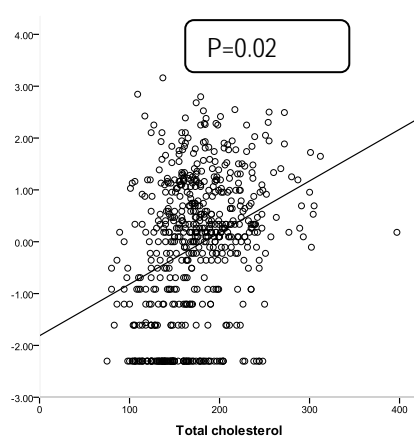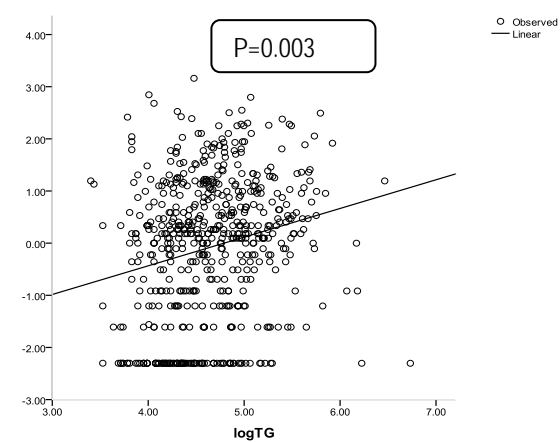

Supplement: MOESM2 [file 25655822]
